# Supplementary material for: Biomarker Testing in Older Patients Treated for an Advanced or Metastatic Non-Squamous Non-Small-Cell Lung Cancer: The French ESME Real-Life Multicenter Cohort Experience
Source: Cancers (Basel). 2021 Dec 24;14(1):92. doi: 10.3390/cancers14010092 (PMC8750267; doi:10.3390/cancers14010092)
Supplement: Supplementary file 1 [file cancers-14-00092-s001.zip › cancers-1461935-supplementary.pdf]

## **Supplementary data**

### **Biomarker testing at aNSCLC diagnosis according to age ( $\geq 75$ years old , and $\geq 80$ year old respectively compare to $< 70$ years old)**

*Biomarker testing was defined as, at least one molecular alteration and/or PD-L1 testing performed within 1 month before or 3 months after the aNSCLC diagnosis. « Molecular testing only » meant testing for at least one molecular alteration excluding the search for PD-L1 status.*

*Supplementary analysis with increased age cutoff for old patients ( $\geq 75$  years old and  $\geq 80$  year old respectively), showed no significant difference with younger patient in biomarker testing at aNSCLC diagnosis, neither between patients aged  $\geq 75$  years and their younger counterparts (adjusted odd ratio 1.03, 95%CI 0.89-1.19,  $p=0.6909$ ), nor between patients aged  $\geq 80$  years and younger (adjusted odd ratio 0.97, 95%CI 0.80-1.18,  $p=0.7486$ ).*

| <b>Biomarker testing at aNSCLC diagnosis<br/>N = 9748</b> | <b>&lt; 75<br/>N = 8107</b> | <b><math>\geq 75</math><br/>N = 1641</b> | <b>p</b> |
|-----------------------------------------------------------|-----------------------------|------------------------------------------|----------|
| Yes                                                       | 5234 (65%)                  | 1051 (64%)                               | 0.6909   |
| Molecular testing only                                    | 3823 (47%)                  | 797 (49%)                                |          |
| PDL1 testing only                                         | 177 (2%)                    | 29 (2%)                                  |          |
| Molecular & PDL1 testing                                  | 1233 (15%)                  | 225 (14%)                                |          |
| Missing                                                   | 1                           | 0                                        |          |

| <b>Biomarker testing at aNSCLC diagnosis<br/>N = 9748</b> | <b>&lt; 80<br/>N = 8949</b> | <b><math>\geq 80</math><br/>N = 799</b> | <b>p</b> |
|-----------------------------------------------------------|-----------------------------|-----------------------------------------|----------|
| Yes                                                       | 5774 (65%)                  | 511 (64%)                               | 0.7486   |
| Molecular testing only                                    | 4228 (47%)                  | 392 (49%)                               |          |
| PDL1 testing only                                         | 193 (2%)                    | 13 (2%)                                 |          |
| Molecular & PDL1 testing                                  | 1532 (15%)                  | 106 (13%)                               |          |
| Missing                                                   | 1                           | 0                                       |          |
